# Supplementary material for: Three-dimensional volume fluorescence-imaging of vascular plasticity in adipose tissues
Source: PubMed Central journal article supplement — Mol Metab. 2018 Jun 7;14:71–81. doi: 10.1016/j.molmet.2018.06.004 (PMC6034070; doi:10.1016/j.molmet.2018.06.004), 2018-06-07
Supplement: mmc2.pdf [file mmc2.pdf]

## Supplemental Movie Legends

### **Movie S1. Isolectin-labeled vasculatures in mouse inguinal WAT are visualized via 3D volume fluorescence-imaging.**

The wild-type mice were intravenously injected with Isolectin GS-IB4 Alexa647. Inguinal WAT were processed for tissue optical clearing and were imaged at 1.26x magnification on the lightsheet microscope.

### **Movie S2. CD31<sup>+</sup> vasculatures in mouse inguinal WAT are visualized via 3D volume fluorescence-imaging.**

Inguinal WAT of the wild-type mice were processed for the whole-mount immunolabeling of CD31/PECAM-1 and were imaged at 12.6x magnification on the lightsheet microscope.

Representative 500  $\mu\text{m}$  x 500  $\mu\text{m}$  x 500  $\mu\text{m}$  cubic tissue volume is shown.

### **Movie S3. Isolectin-labeled vasculatures in mouse interscapular BAT are visualized via 3D volume fluorescence-imaging.**

The wild-type mice were intravenously injected with Isolectin GS-IB4 Alexa647. Interscapular BAT were processed for tissue optical clearing and were imaged at 12.6x magnification on the lightsheet microscope. Representative lightsheet scanning of 500  $\mu\text{m}$ -depth tissue is shown.

### **Movie S4. Spatial engagement of the sympathetic fibers with the vasculatures in mouse inguinal WAT is visualized via 3D volume fluorescence-imaging.**

The wild-type mice were intravenously injected with Isolectin GS-IB4 Alexa647 (green).

Inguinal WAT were processed for the whole-mount immunolabeling of tyrosine hydroxylase (magenta) and were imaged at 12.6x magnification on the lightsheet microscope. Representative 500  $\mu\text{m}$  x 500  $\mu\text{m}$  x 500  $\mu\text{m}$  cubic tissue volume is shown.

### **Movie S5. Association of the increased vasculatures with the cold-induced beige cells in mouse inguinal WAT is visualized via 3D volume fluorescence-imaging.**

*Ucp1<sup>CreERT2/+</sup>; Rosa26-LSL-EGFP* mice daily treated with 4-hydroxytamoxifen were cold-challenged for 4 days. The mice were then intravenously injected with Isolectin GS-IB4

Alexa647 (green). Inguinal WAT were processed for the whole-mount immunolabeling of EGFP (magenta) and were imaged at 12.6x magnification on the lightsheet microscope. Representative 3D image of 500  $\mu$ m-depth tissue is shown.

# Supplemental Figures

## Figure S1

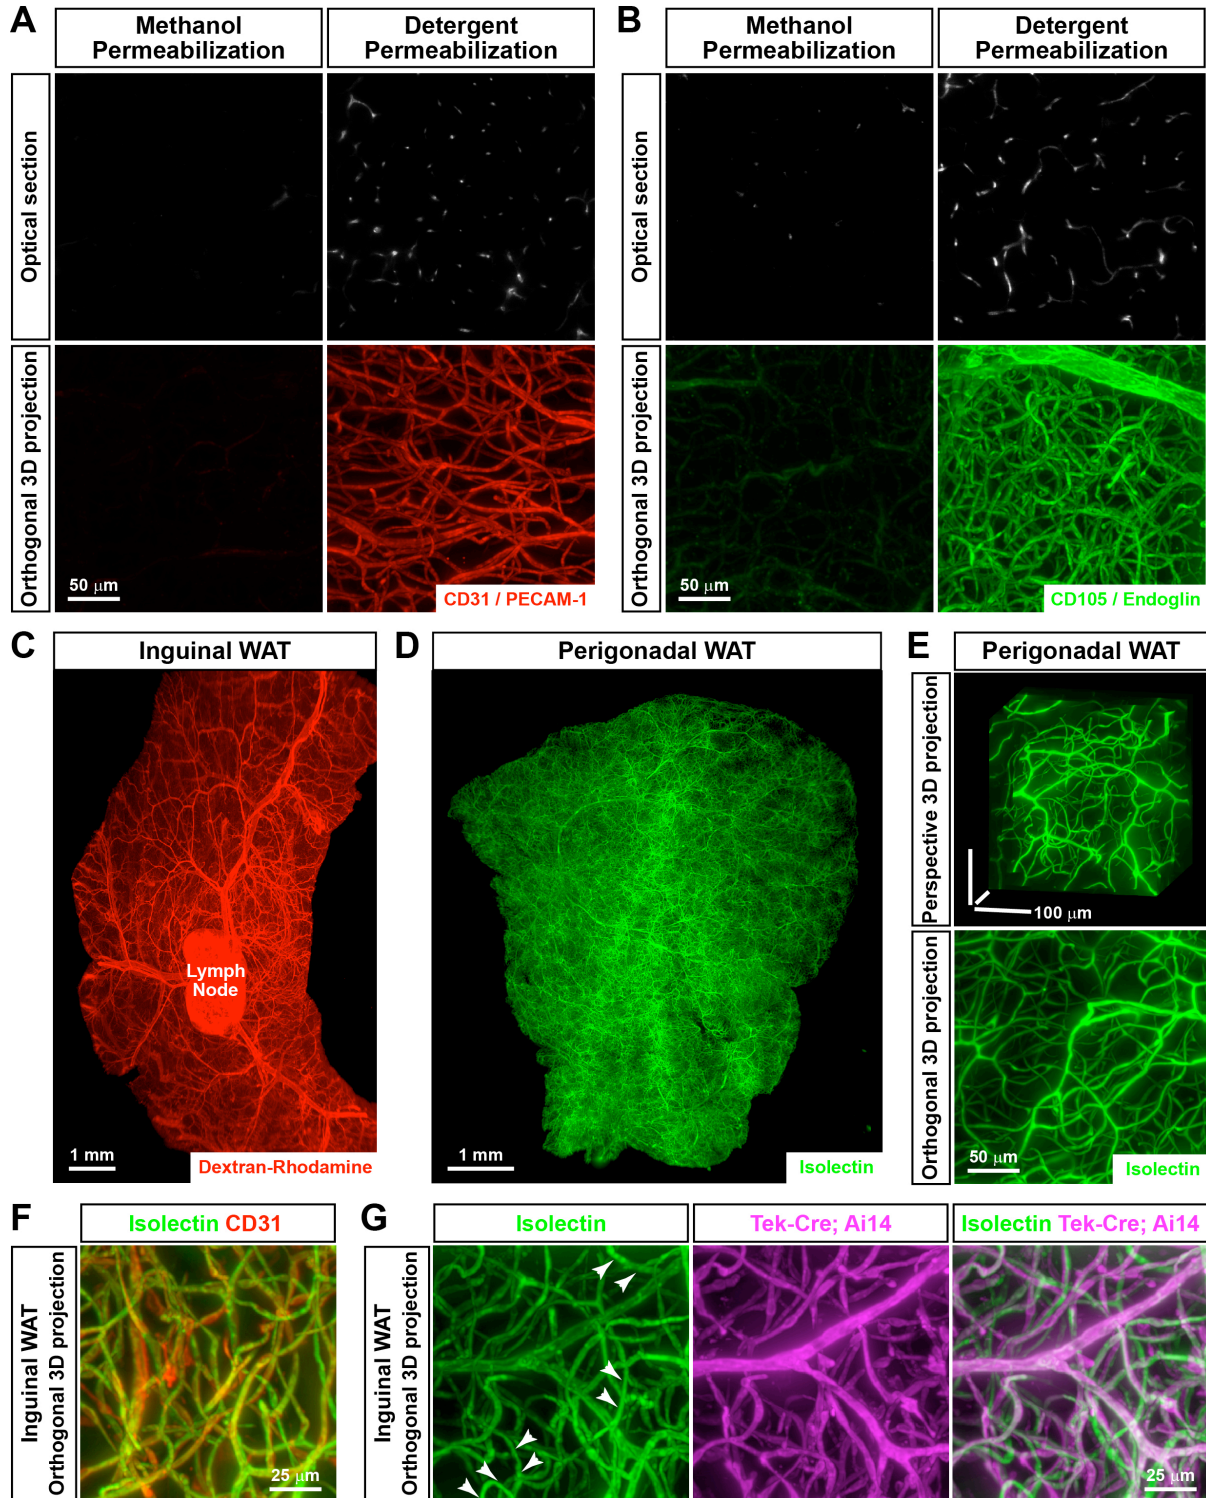

**Figure S1. Three-dimensional volume fluorescence-imaging of the vasculatures in mouse adipose tissues.**

**(A and B)** Comparison of the methanol- or detergent-based permeabilization steps for the whole-mount immunolabeling of vasculatures in adipose tissues. Inguinal WAT of the wild-type mice maintained at room temperature **(A)** or cold-challenged for 4 days **(B)** were processed for the whole-mount immunolabeling of CD31/PECAM-1 **(A)** or CD105/Endoglin **(B)** with the methanol- or detergent-based permeabilization steps, respectively. The immunolabeled and optically cleared tissues were imaged at 12.6x magnification on the lightsheet microscope. Representative optical sections of the lightsheet imaging (upper panels) or representative orthogonal 3D-projection images of 500  $\mu\text{m}$ -depth tissues (lower panels) are shown. **(C)** The wild-type mice were intravenously injected with 2,000,000MW-Dextran Tetramethylrhodamine. Inguinal WAT were processed for tissue optical clearing and were imaged at 1.26x magnification on the lightsheet microscope. Representative orthogonal 3D-projection image is shown. **(D and E)** The wild-type mice were intravenously injected with Isolectin GS-IB4 Alexa647. Perigonadal WAT were processed for tissue optical clearing and were imaged at 1.26x **(D)** or 12.6x **(E)** magnification on the lightsheet microscope. **(D)** Representative orthogonal 3D-projection image is shown. **(E)** Representative perspective 3D-projection image of 300  $\mu\text{m}$  x 300  $\mu\text{m}$  x 300  $\mu\text{m}$  cubic tissue volume (upper panel) or representative orthogonal 3D-projection image of 500  $\mu\text{m}$ -depth tissue (lower panel) is shown. **(F)** The wild-type mice were intravenously injected with Isolectin GS-IB4 Alexa647 (green). Inguinal WAT were processed for the whole-mount immunolabeling of CD31/PECAM-1 (red) and were imaged at 12.6x magnification on the lightsheet microscope. Representative orthogonal 3D-projection image of 500  $\mu\text{m}$ -depth tissue is shown. **(G)** *Tek-Cre; Rosa26-LSL-tdTomato (Ai14)* mice were intravenously injected with Isolectin GS-IB4 Alexa647 (green). Inguinal WAT were processed for the whole-mount immunolabeling of tdTomato (magenta) and were imaged at 12.6x magnification on the lightsheet microscope. Representative orthogonal 3D-projection images of 500  $\mu\text{m}$ -depth tissue are shown. Arrowheads denote the examples of Isolectin<sup>+</sup> tdTomato<sup>-</sup> vasculatures.



**Figure S2**

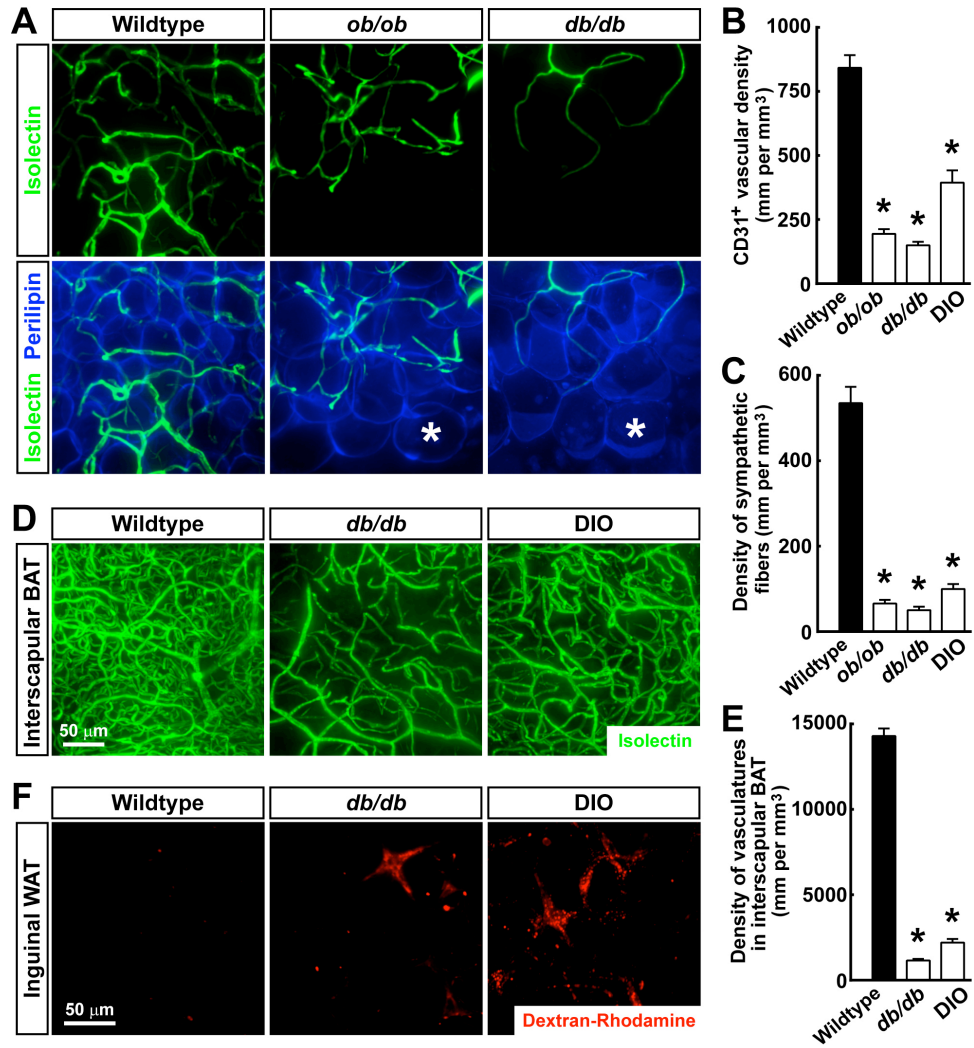

**Figure S2. Pathological remodeling of the vasculatures in adipose tissues under the obese conditions.**

(A) The wild-type, *ob/ob*, and *db/db* mice were intravenously injected with Isolectin GS-IB4 Alexa647 (green). Inguinal WAT were processed for the whole-mount immunolabeling of perilipin (blue) and were imaged at 12.6x magnification on the lightsheet microscope. Representative orthogonal 3D-projection images of 500  $\mu\text{m}$ -depth tissues are shown. Asterisks denote the adipocytes without surrounding vasculatures (i.e., “vasculature-less” adipocytes). (B and C) Inguinal WAT of the wild-type, *ob/ob*, *db/db*, and diet-induced obesity (DIO) mice were processed for the whole-mount immunolabeling of CD31/PECAM-1 (B) or tyrosine hydroxylase (C) and were imaged at 12.6x magnification on the lightsheet microscope. Density of CD31<sup>+</sup> vasculatures (B) or the sympathetic fibers (C) was quantified.  $n = 3$ , mean  $\pm$  SEM, \*  $p < 0.01$ . (D and E) The wild-type, *db/db*, and diet-induced obesity (DIO) mice were intravenously injected with Isolectin GS-IB4 Alexa647. Interscapular BAT were processed for tissue optical clearing and were imaged at 12.6x magnification on the lightsheet microscope. (D) Representative orthogonal 3D-projection images of 100  $\mu\text{m}$ -depth tissues are shown. (E) Density of the vasculatures in interscapular BAT was quantified.  $n = 3$ , mean  $\pm$  SEM, \*  $p < 0.01$ . (F) To assess the leakage of vasculatures, the wild-type, *db/db*, and diet-induced obesity (DIO) mice were intravenously injected with 2,000,000MW-Dextran Tetramethylrhodamine. The mice were thoroughly perfused with PBS at 10 min after the dextran-dye injection. Inguinal WAT were processed for tissue optical clearing and were imaged at 12.6x magnification on the lightsheet microscope. Representative orthogonal 3D-projection images of 500  $\mu\text{m}$ -depth tissues are shown.

# Figure S3

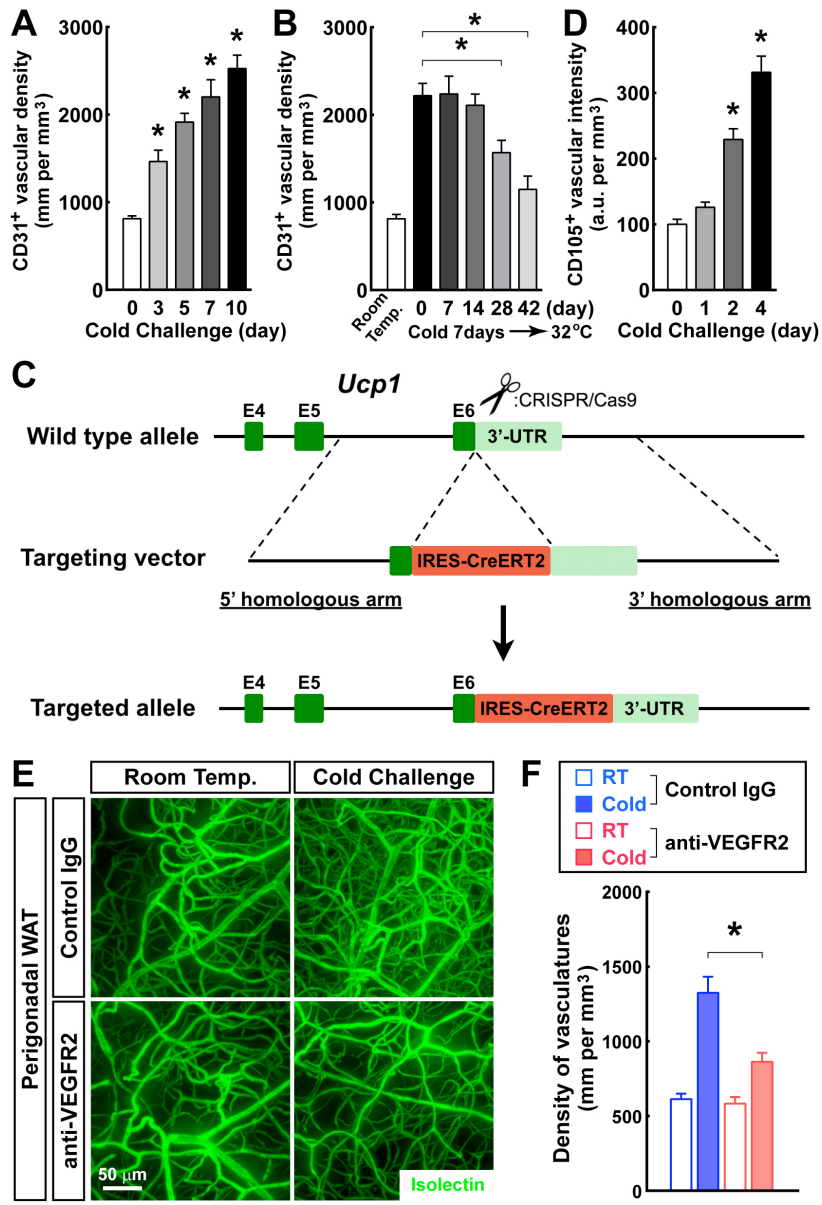

**Figure S3. Vascular plasticity in WAT in response to cold challenge.**

(A) The wild-type mice were subject to cold challenge (4°C). Inguinal WAT were harvested at the indicated time points, processed for the whole-mount immunolabeling of CD31/PECAM-1, and imaged at 12.6x magnification on the lightsheet microscope. Density of CD31<sup>+</sup> vasculatures was quantified. n = 4, mean ± SEM, \*  $p < 0.01$ . (B) The wild-type mice were subjected to cold challenge for 7 days and then reacclimated at the thermal-neutral condition (32°C). Inguinal WAT were harvested at the indicated time points, processed for the whole-mount immunolabeling of CD31/PECAM-1, and imaged at 12.6x magnification on the lightsheet microscope. Density of CD31<sup>+</sup> vasculatures was quantified. n = 4, mean ± SEM, \*  $p < 0.01$ . (C) Diagram of the generation of *Ucp1*<sup>CreERT2/+</sup> knock-in mouse line. (D) The wild-type mice were subjected to cold challenge. Inguinal WAT were harvested at the indicated time points, processed for the whole-mount immunolabeling of CD105/Endoglin, and imaged at 12.6x magnification on the lightsheet microscope. Intensity of CD105-immunolabeling was quantified. n = 4, mean ± SEM, \*  $p < 0.01$ . (E and F) The wild-type mice administered VEGFR2-neutralizing antibody or control IgG were maintained at room temperature or subjected to cold challenge. The mice were then intravenously injected with Isolectin GS-IB4 Alexa647. Perigonadal WAT were processed for tissue optical clearing and were imaged at 12.6x magnification on the lightsheet microscope. (E) Representative orthogonal 3D-projection images of 500 μm-depth tissues are shown. (F) Density of the vasculatures in perigonadal WAT was quantified. n = 3, mean ± SEM, \*  $p < 0.01$ .

**Figure S4**

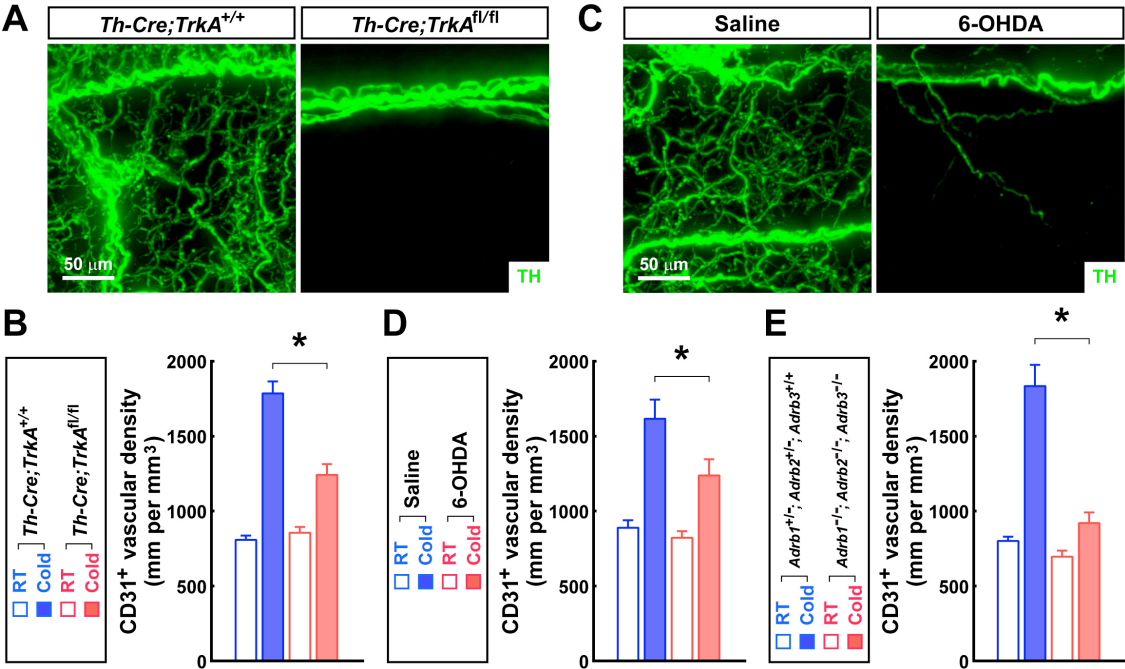

**Figure S4. Cold-induced vascular plasticity in WAT depends on the sympathetic-derived catecholamine signal.**

(A) Inguinal WAT of *Th-Cre;TrkA<sup>+/+</sup>* or *Th-Cre;TrkA<sup>fl/fl</sup>* mice were processed for the whole-mount immunolabeling of tyrosine hydroxylase (TH) and were imaged at 12.6x magnification on the lightsheet microscope. Representative orthogonal 3D-projection images of 500  $\mu$ m-depth tissues are shown. (B) *Th-Cre;TrkA<sup>+/+</sup>* or *Th-Cre;TrkA<sup>fl/fl</sup>* mice were maintained at room temperature or subjected to cold challenge. Inguinal WAT were processed for the whole-mount immunolabeling of CD31/PECAM-1 and were imaged at 12.6x magnification on the lightsheet microscope. Density of CD31<sup>+</sup> vasculatures was quantified. n = 4, mean  $\pm$  SEM, \*  $p < 0.01$ . (C and D) Inguinal WAT of the wild-type mice were locally treated with 6-hydroxydopamine (6-OHDA) or saline control. (C) Inguinal WAT were harvested at 6 days after the treatment, processed for the whole-mount immunolabeling of tyrosine hydroxylase (TH), and imaged at 12.6x magnification on the lightsheet microscope. Representative orthogonal 3D-projection images of 500  $\mu$ m-depth tissues are shown. (D) The mice were subjected to cold challenge at 6 days after the treatment. Inguinal WAT were processed for the whole-mount immunolabeling of CD31/PECAM-1 and were imaged at 12.6x magnification on the lightsheet microscope. Density of CD31<sup>+</sup> vasculatures was quantified. n = 5, mean  $\pm$  SEM, \*  $p < 0.01$ . (E) *Adrb1<sup>+/-</sup>; Adrb2<sup>+/-</sup>; Adrb3<sup>+/+</sup>* or *Adrb1<sup>-/-</sup>; Adrb2<sup>-/-</sup>; Adrb3<sup>-/-</sup>* mice were maintained at room temperature or subjected to cold challenge. Inguinal WAT were processed for the whole-mount immunolabeling of CD31/PECAM-1 and were imaged at 12.6x magnification on the lightsheet microscope. Density of CD31<sup>+</sup> vasculatures was quantified. n = 5, mean  $\pm$  SEM, \*  $p < 0.01$ .
